# Supplementary material for: Metabolomic Analysis of Multiple Biological Specimens (Feces, Serum, and Urine) by 1H-NMR Spectroscopy from Dairy Cows with Clinical Mastitis
Source: MDPI journal article supplement (doi:10.3390/ani13040741), 2023-02-19

# Metabolomic Analysis of Multiple Biological Specimens (Feces, Serum, and Urine) by $^1\text{H}$ -NMR Spectroscopy from Dairy Cows with Clinical Mastitis

Chenglin Zhu <sup>1</sup>, Qian Zhang <sup>1</sup>, Xin Zhao <sup>1</sup>, Zhibo Yang <sup>1</sup>, Falong Yang <sup>2</sup>, Yang Yang <sup>3</sup>, Junni Tang <sup>1,\*</sup> and Luca Laghi <sup>4,\*</sup>

## Supplementary material

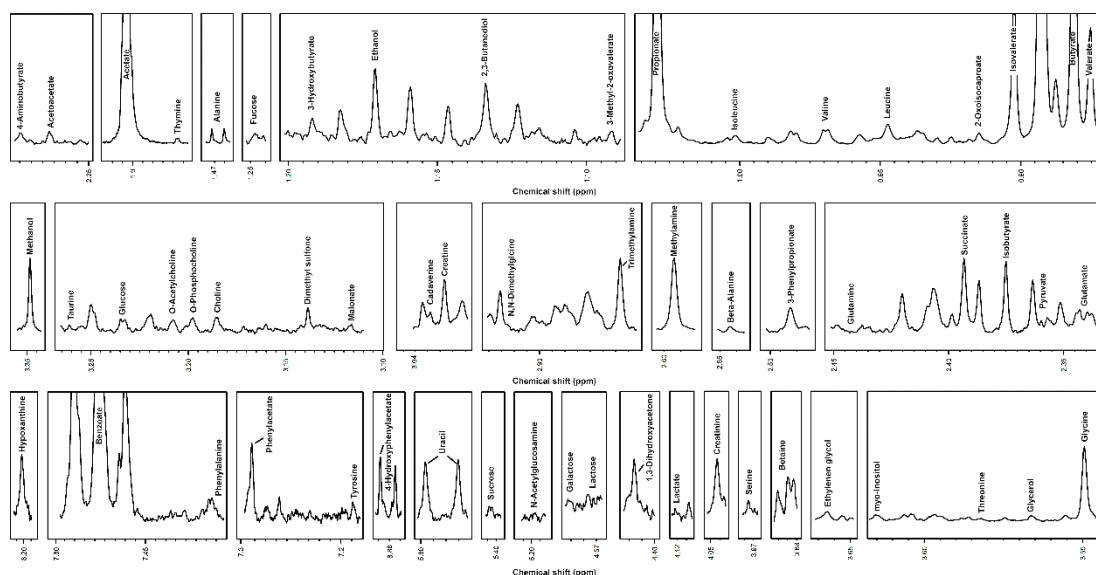

**Figure S1.**  $^1\text{H}$ -NMR spectrum from feces sample representative of all the registered spectra. The name of each molecule appears over the signal used for its quantification. To ease the reader's visual inspection, for each portion a spectrum with a convenient signal-to-noise ratio has been selected.

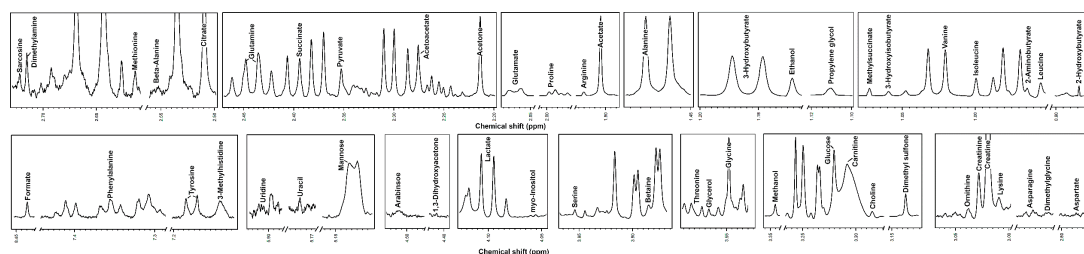

**Figure S2.**  $^1\text{H}$ -NMR spectrum from serum sample representative of all the registered spectra. The name of each molecule appears over the signal used for its quantification. To ease the reader's visual inspection, for each portion a spectrum with a convenient signal-to-noise ratio has been selected.



Figure S5

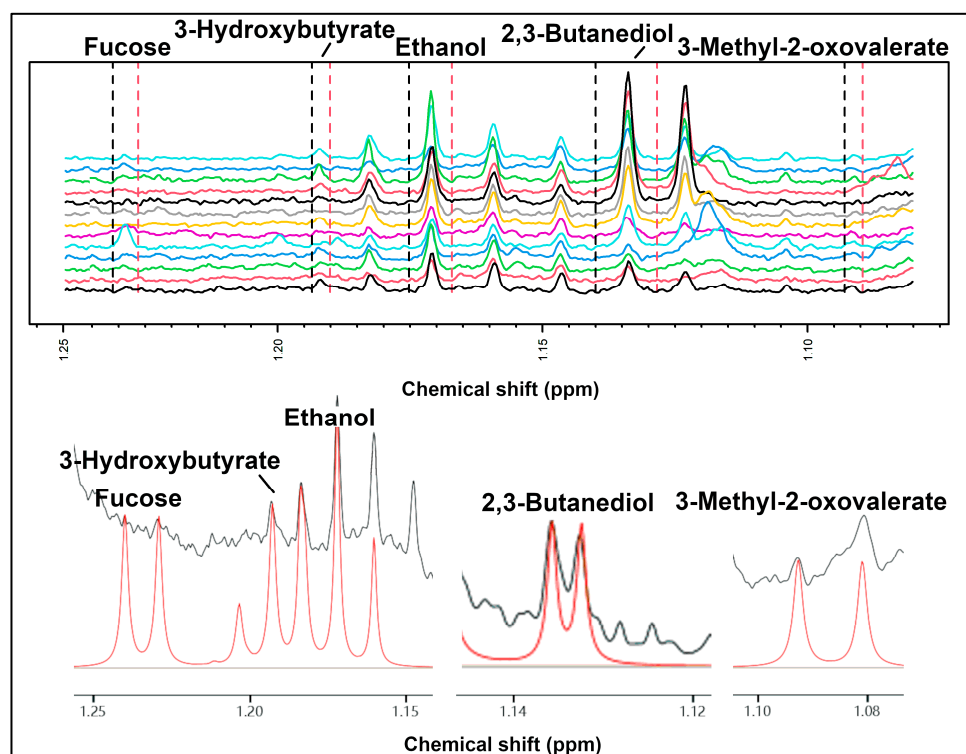

Figure S6

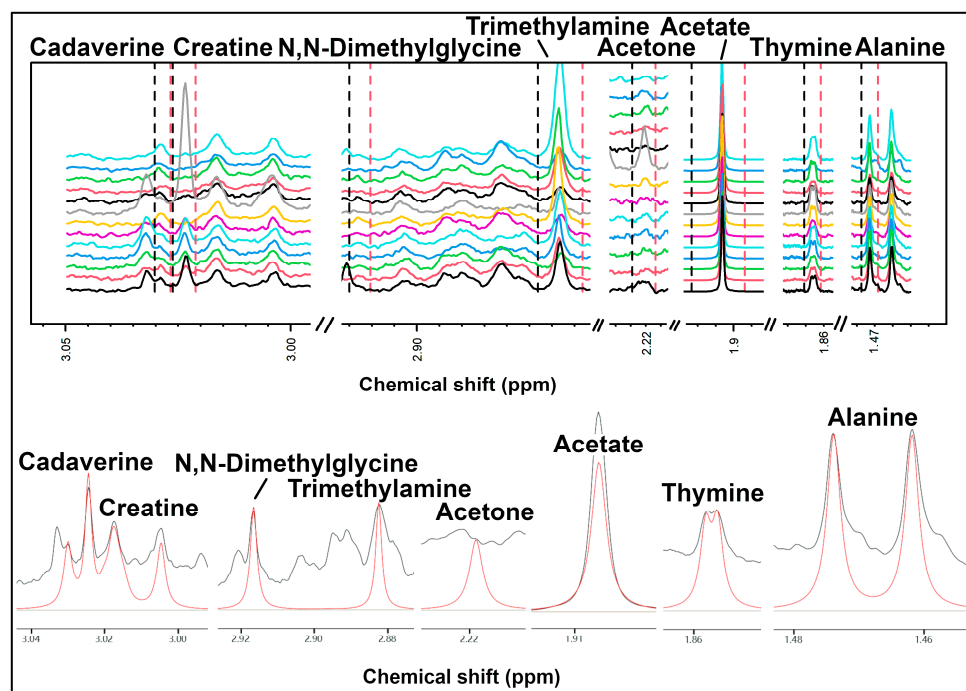

Figure S7

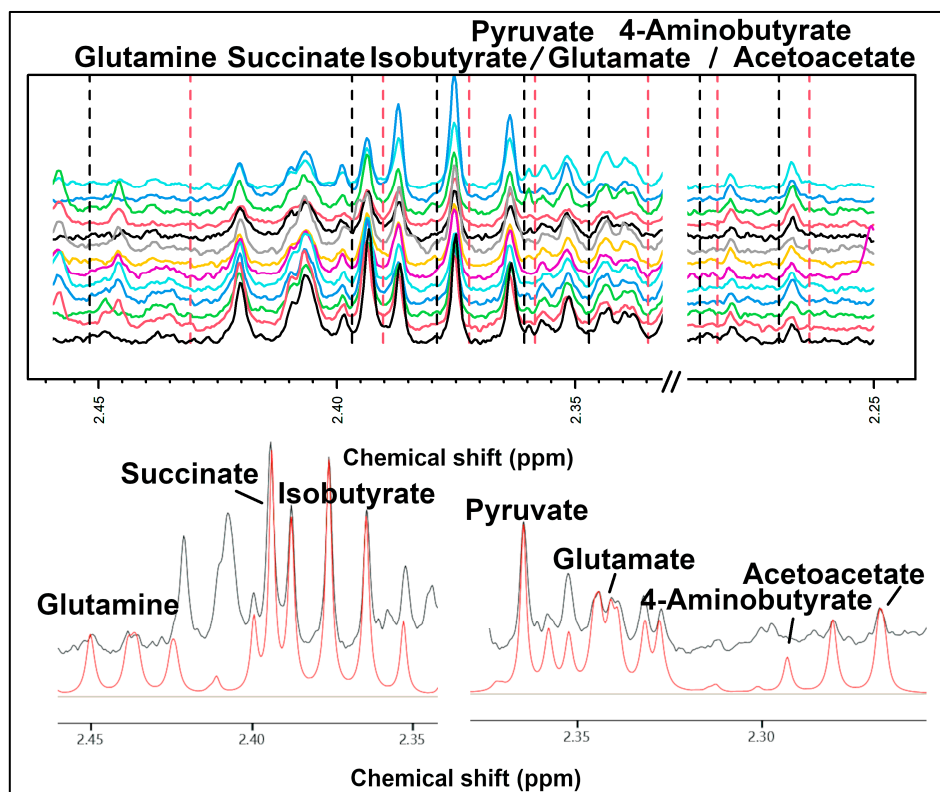

Figure S8

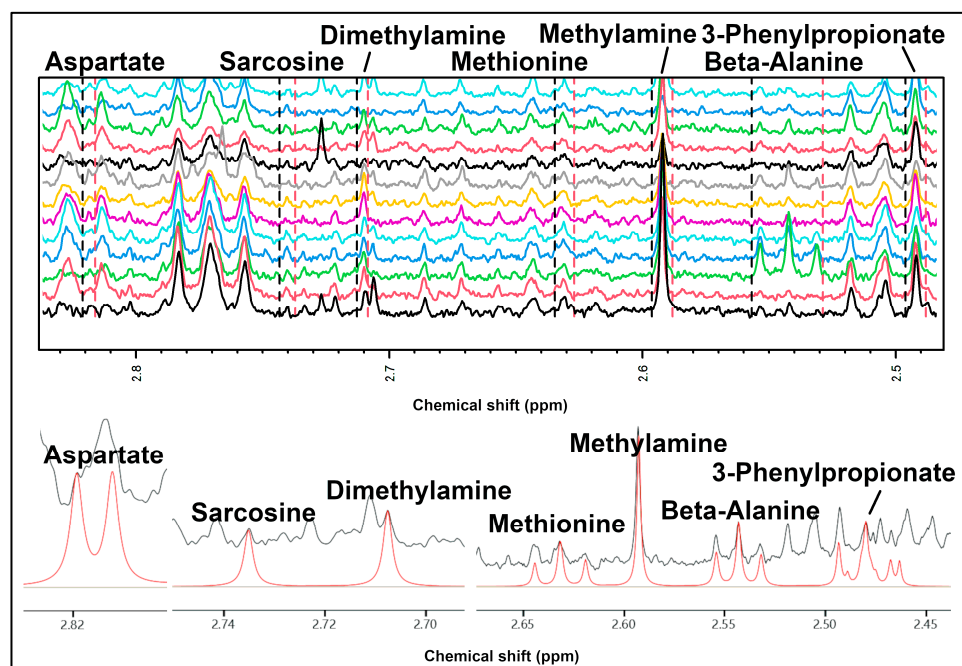

Figure S9

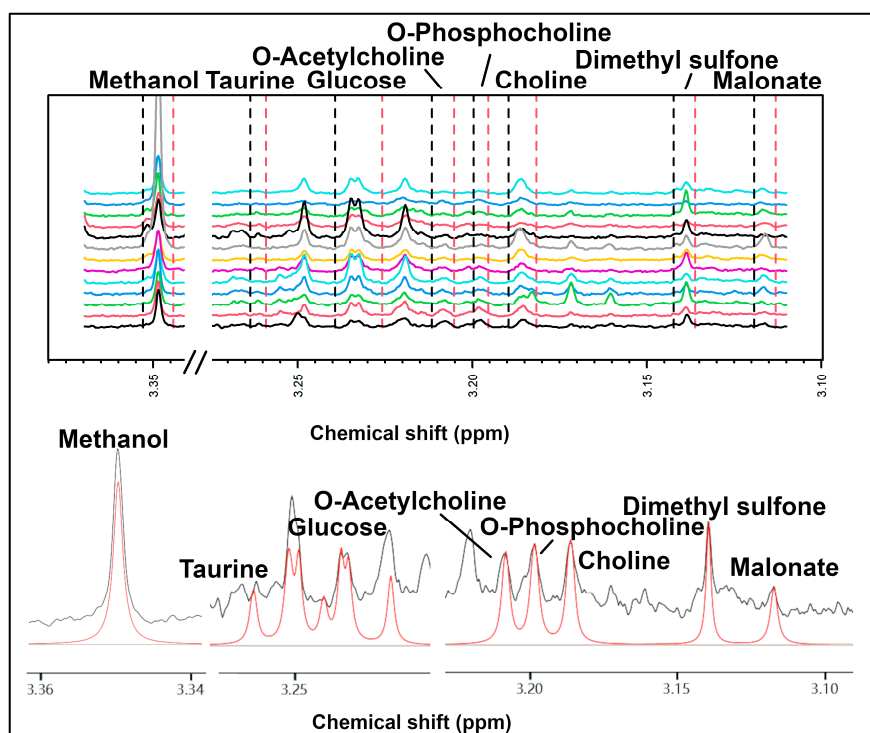

Figure S10

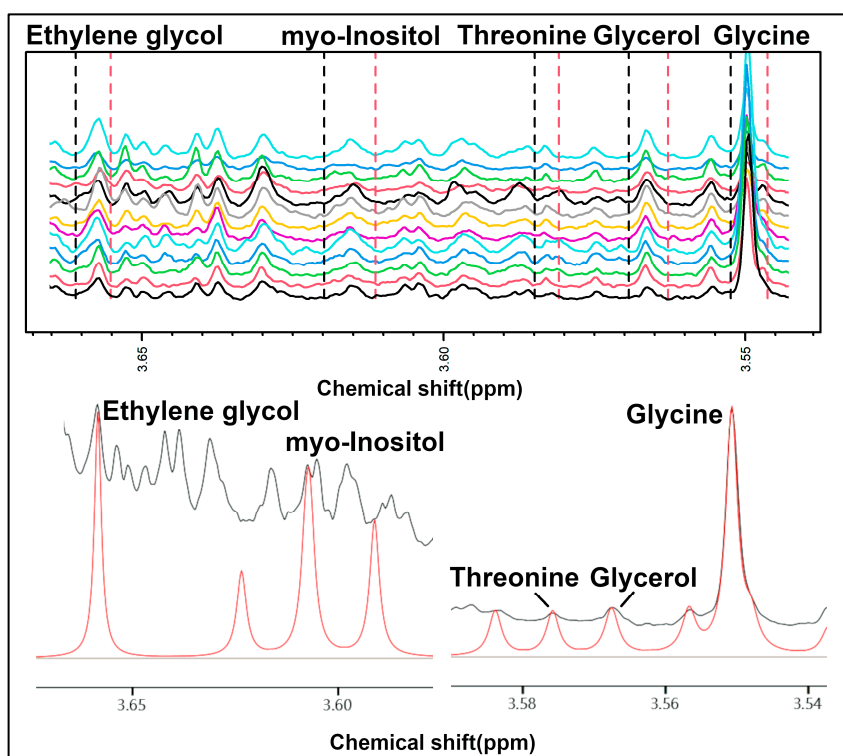

Figure S11

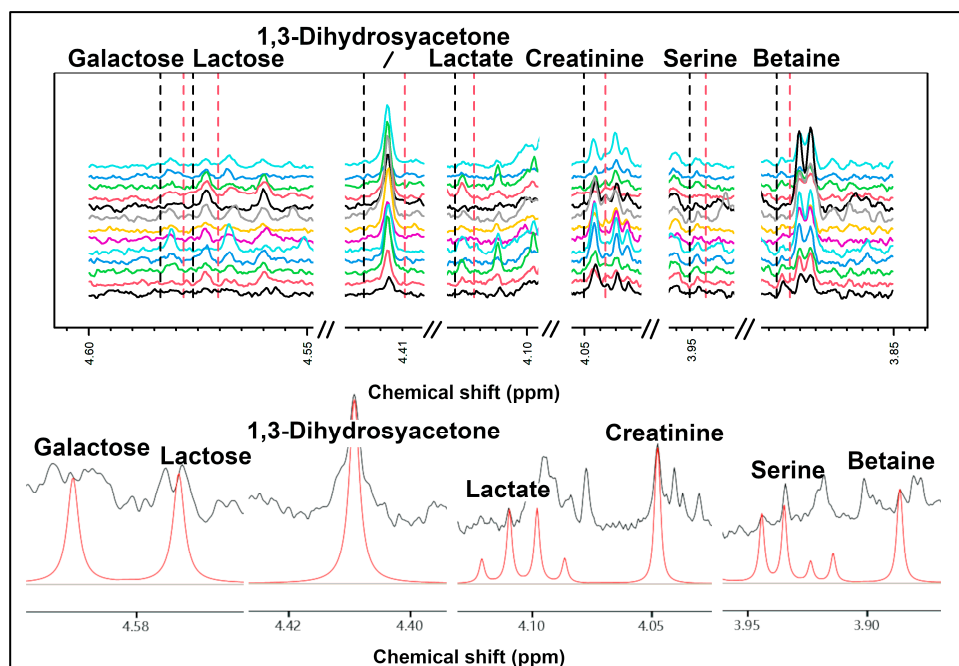

## Urine

Figure S12

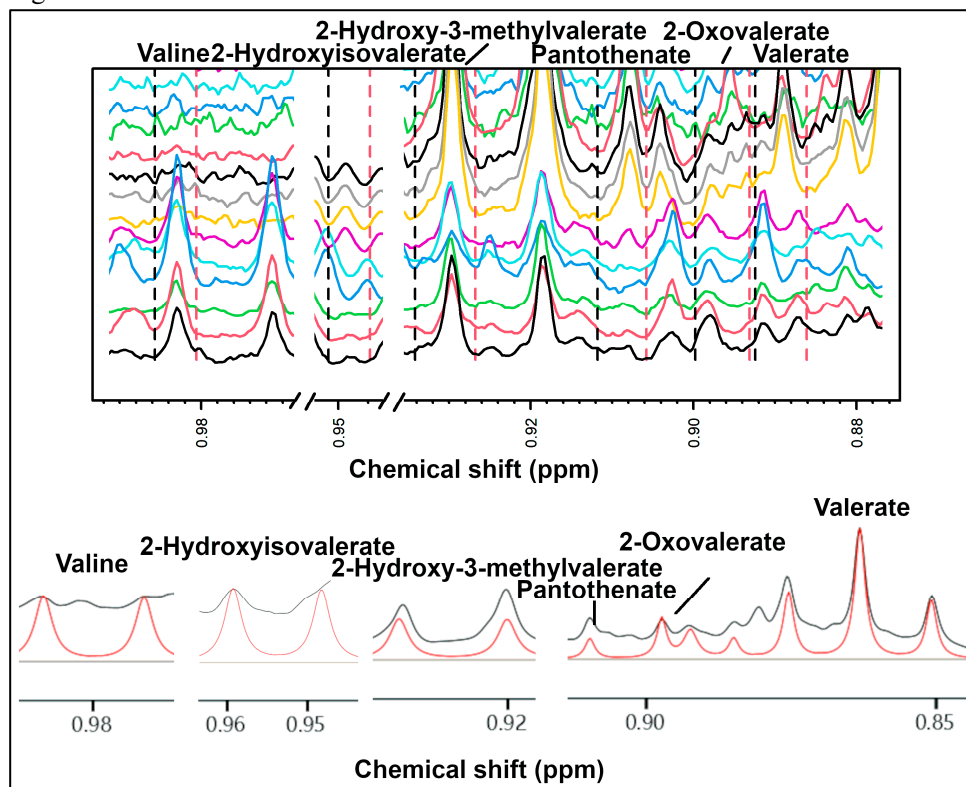

Figure S13

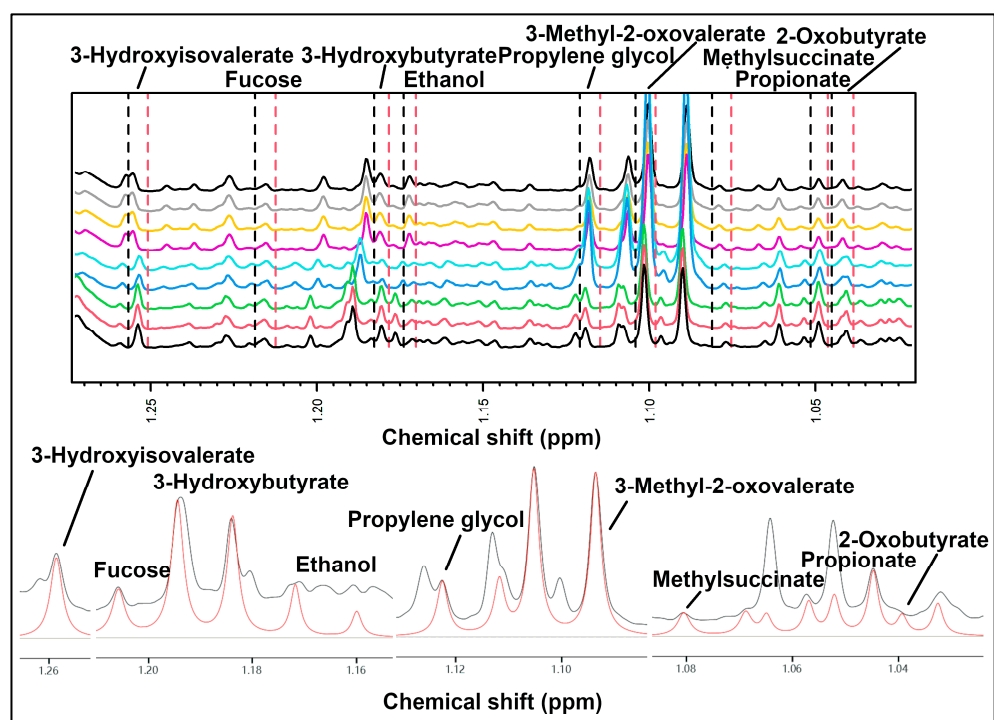

Figure S14

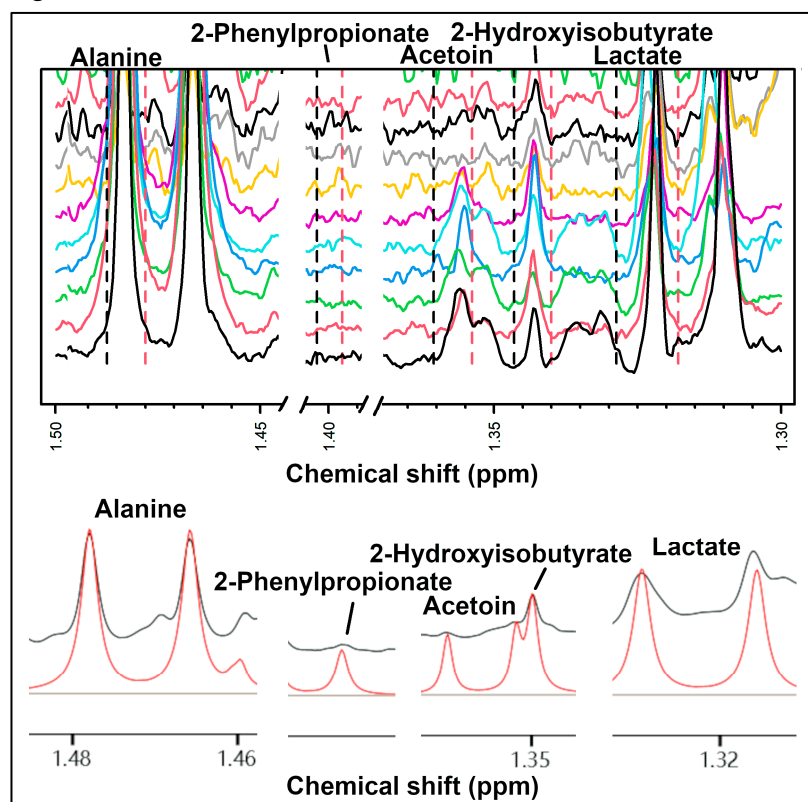



Figure S15

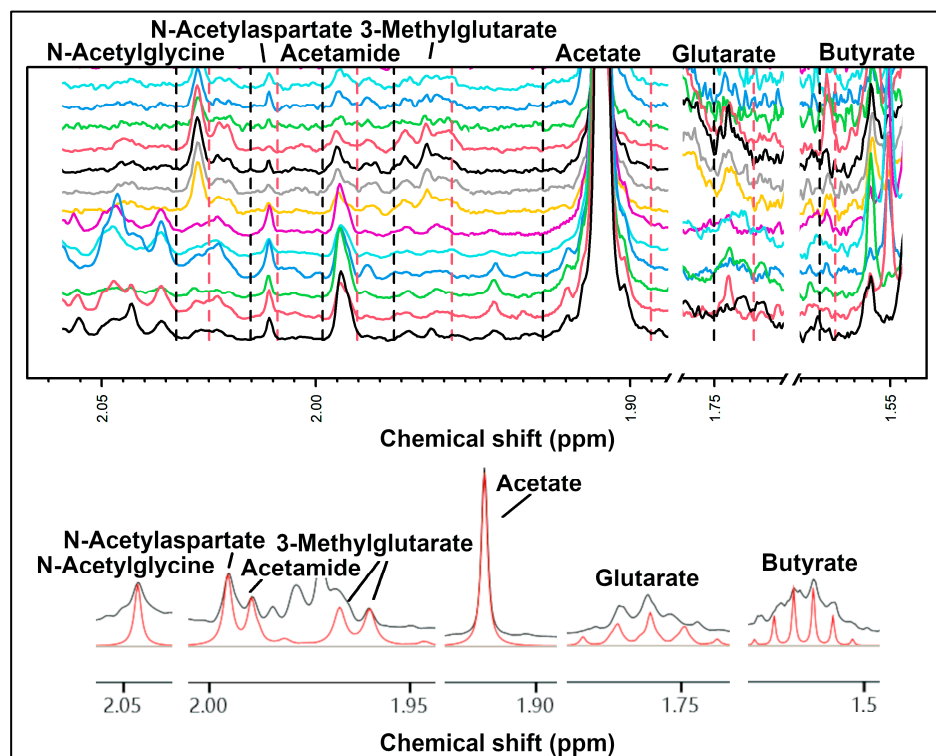

Figure S16

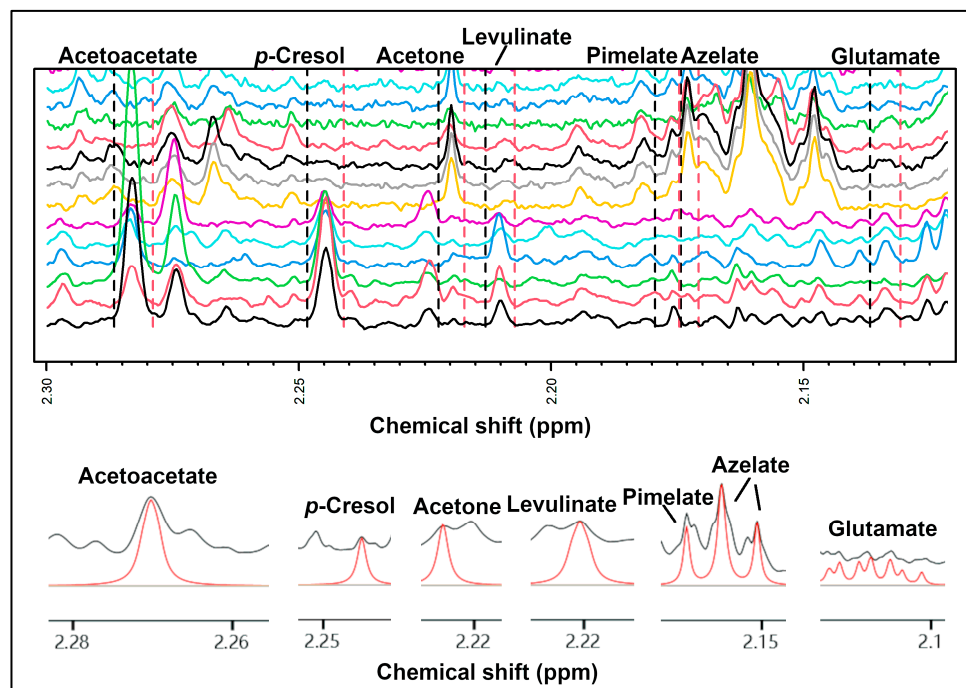



Figure S17

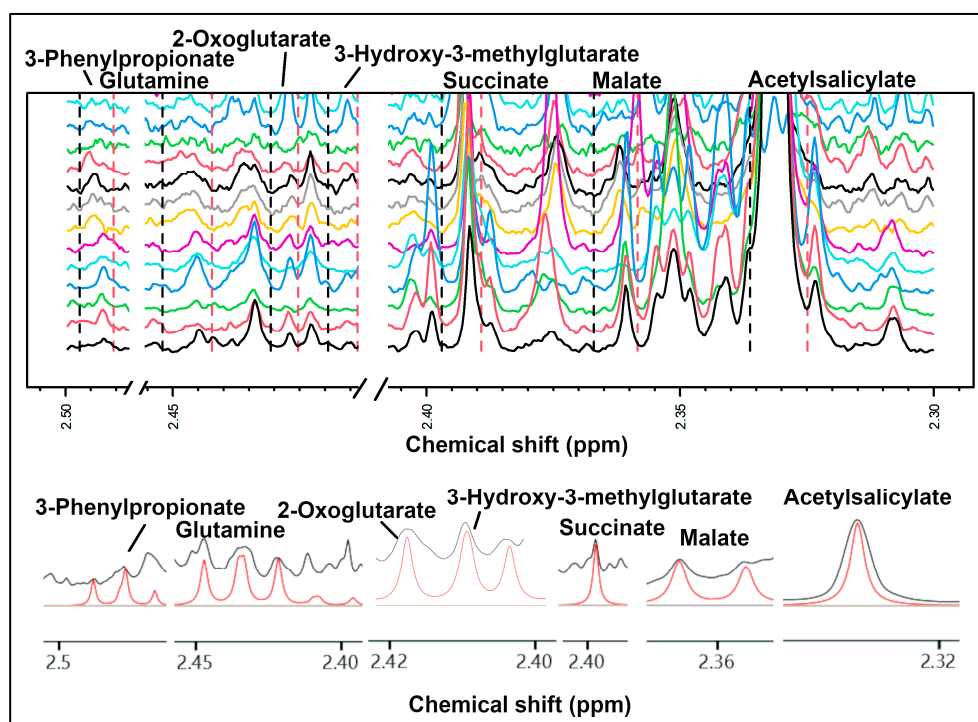

Figure S18

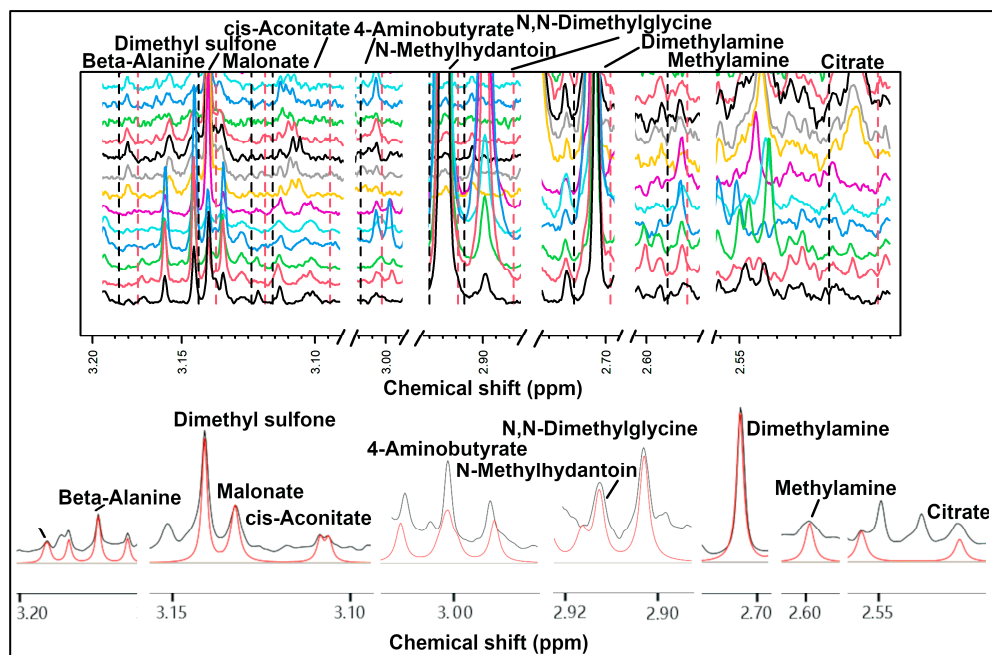

Figure S19

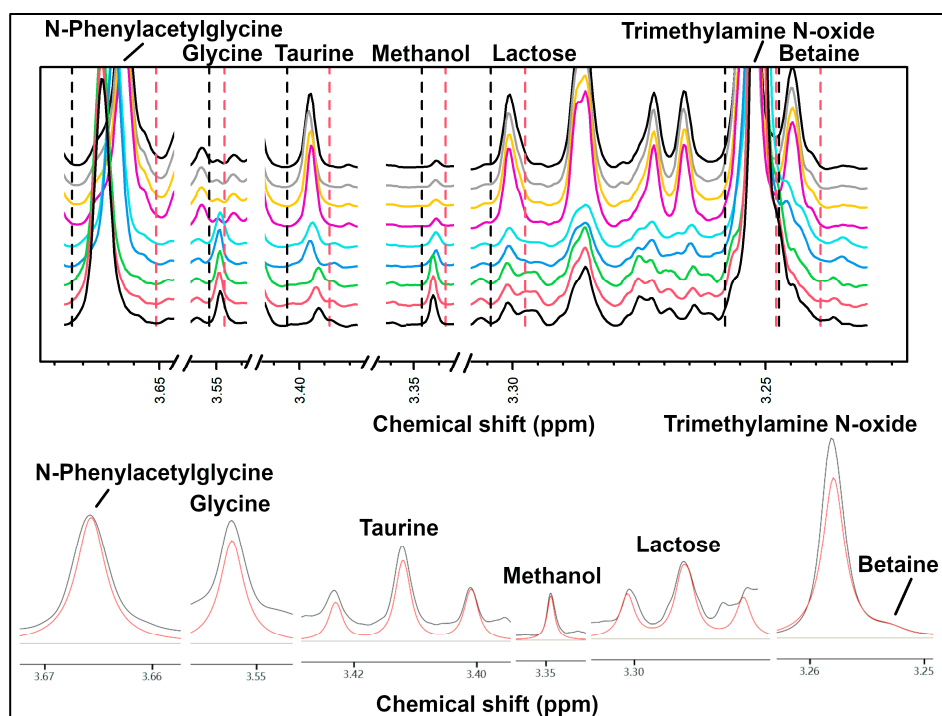

Figure S20

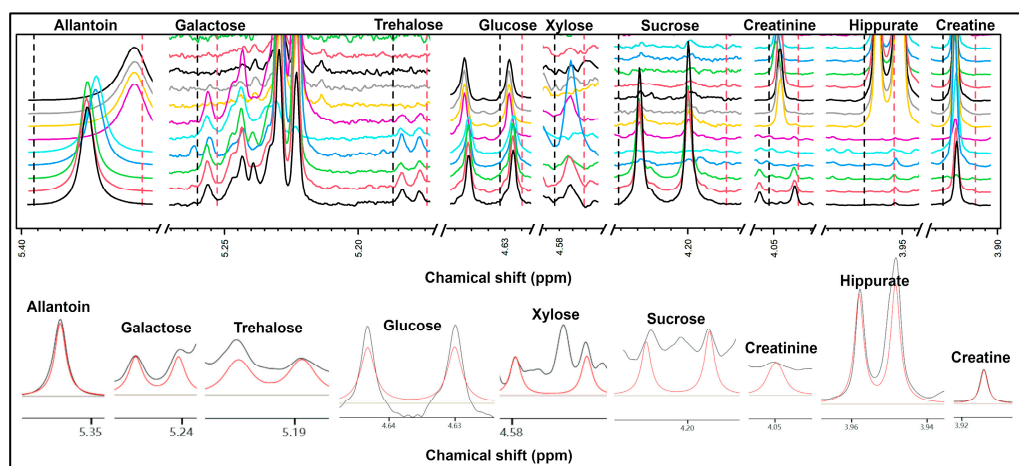

Figure S21

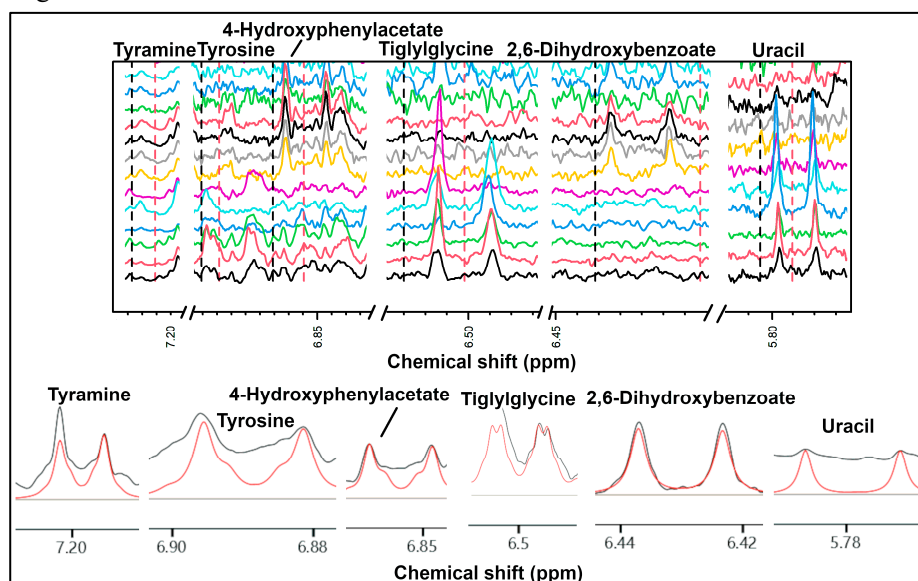

Figure S22

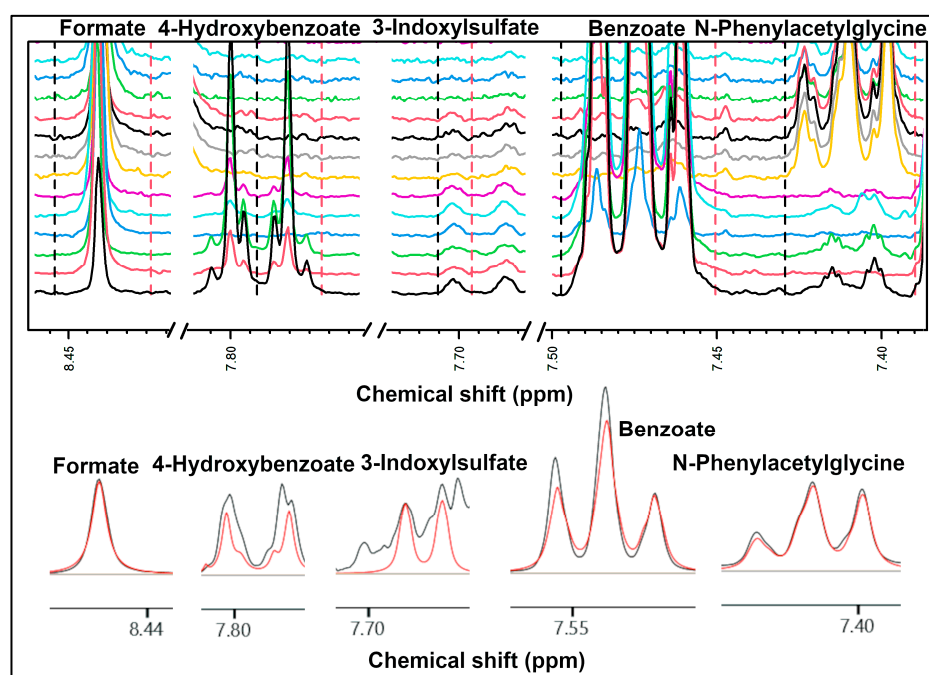

## Serum

Figure S23

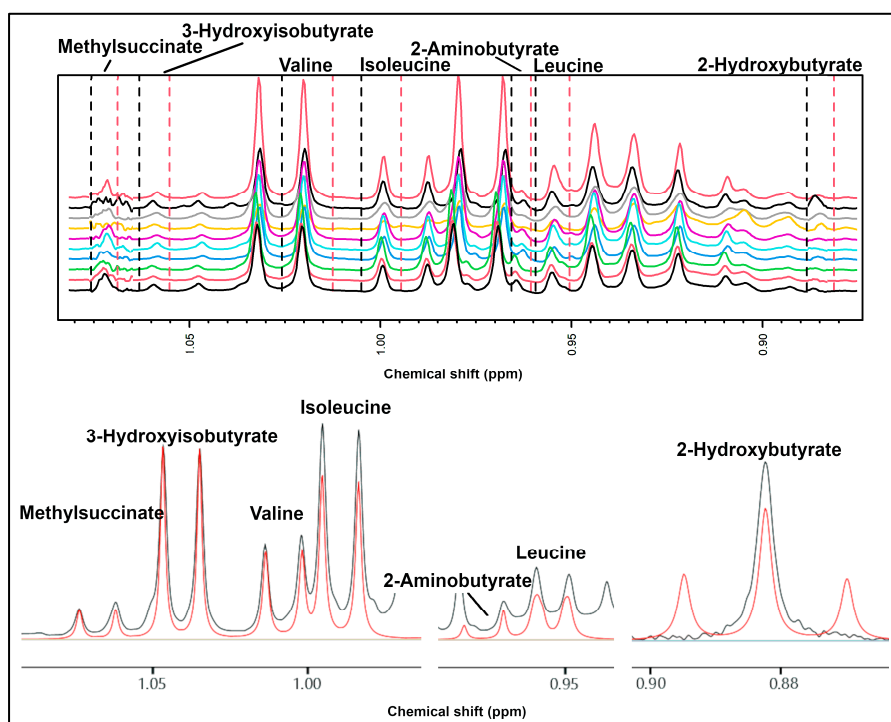

Figure S24

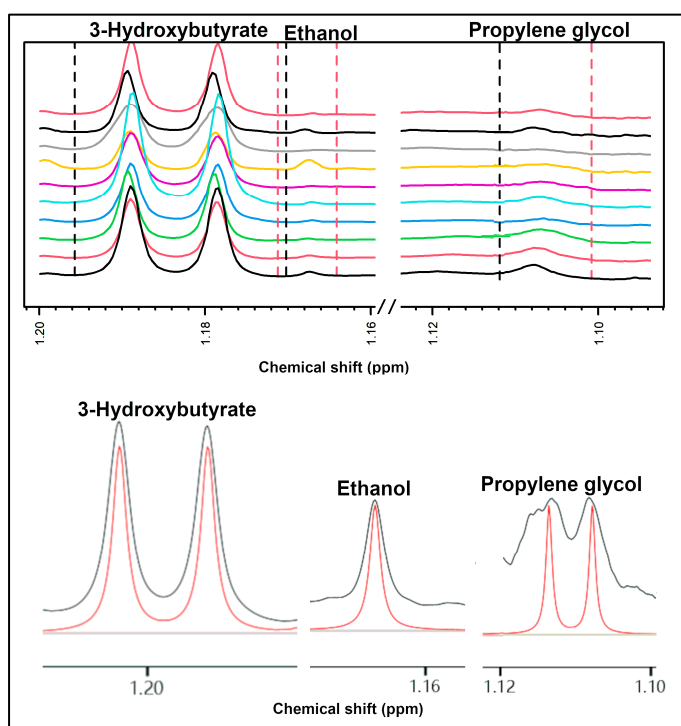

Figure S25

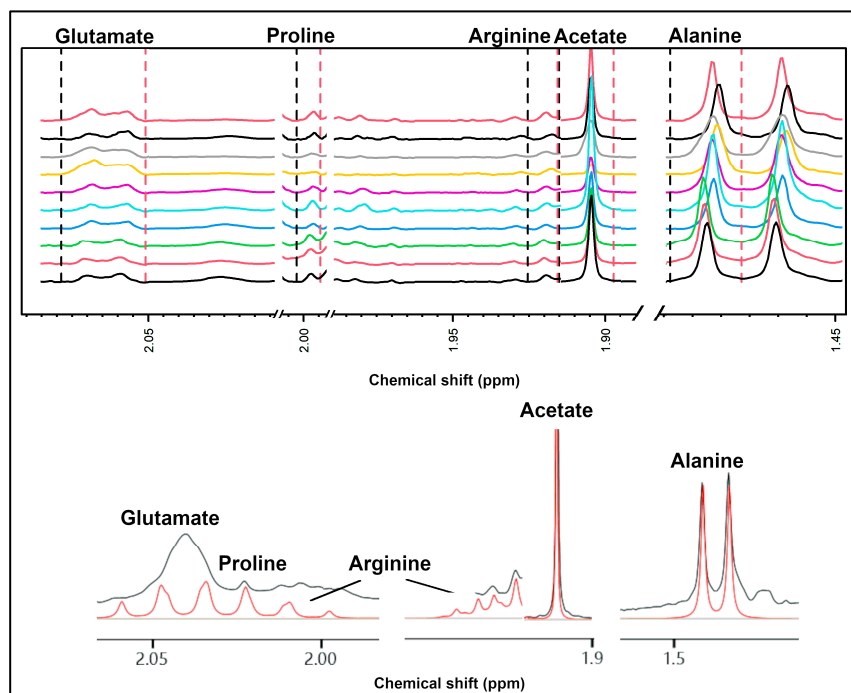

Figure S26

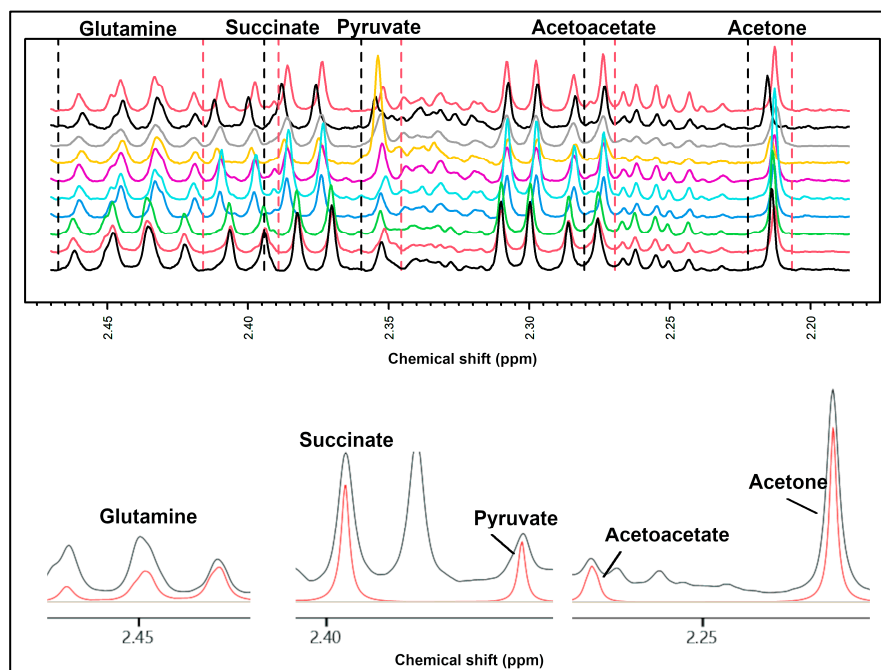

Figure S27

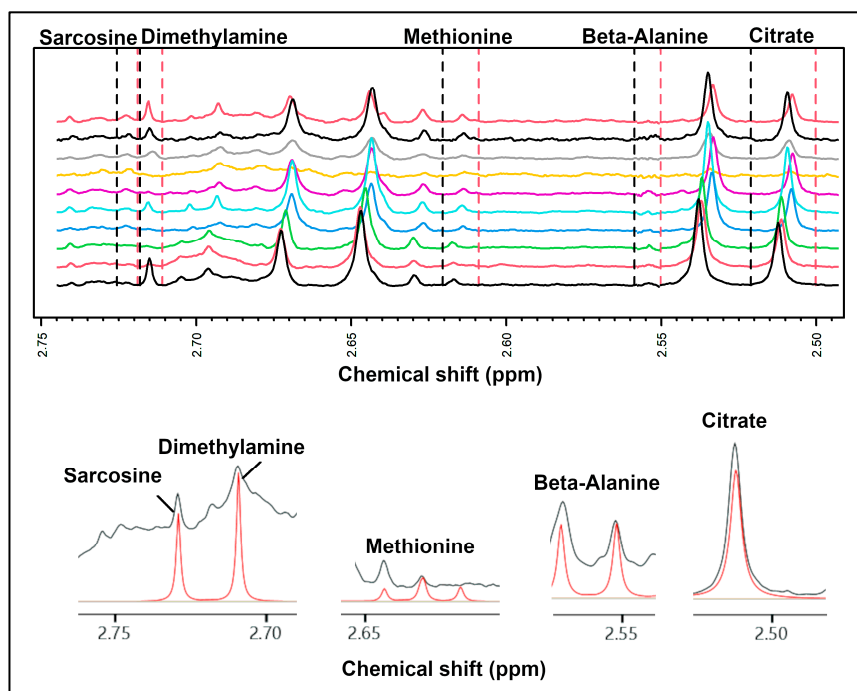

Figure S28

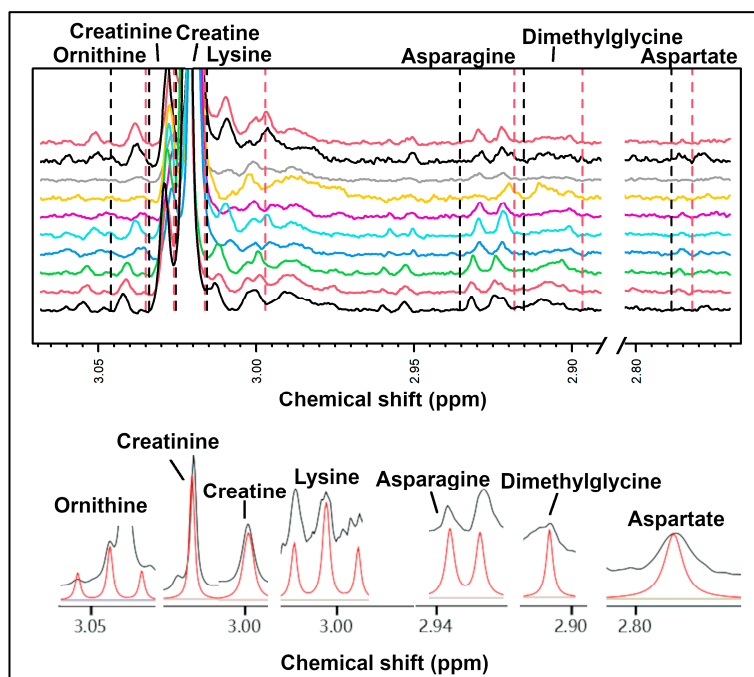

Figure S29

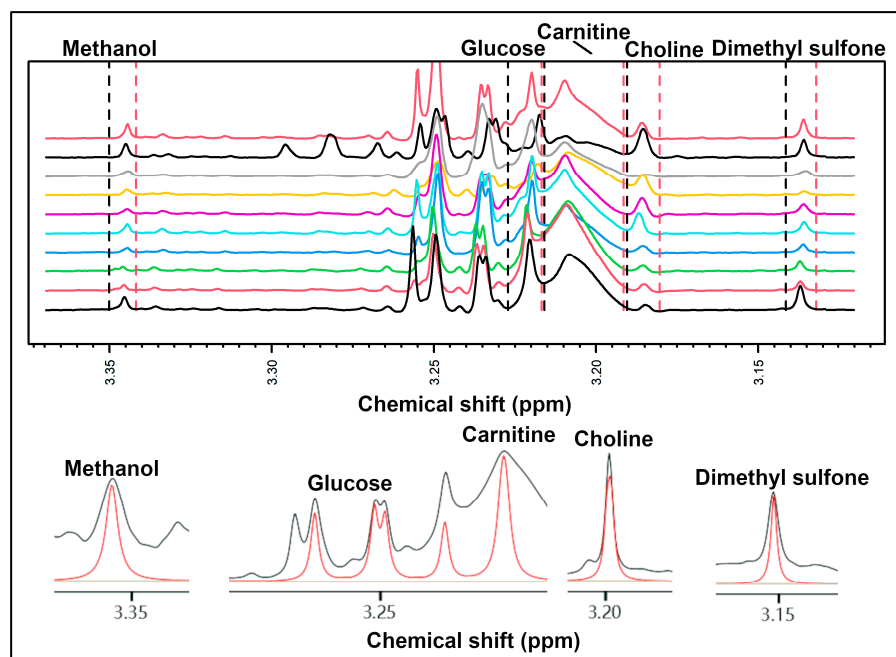

Figure S30

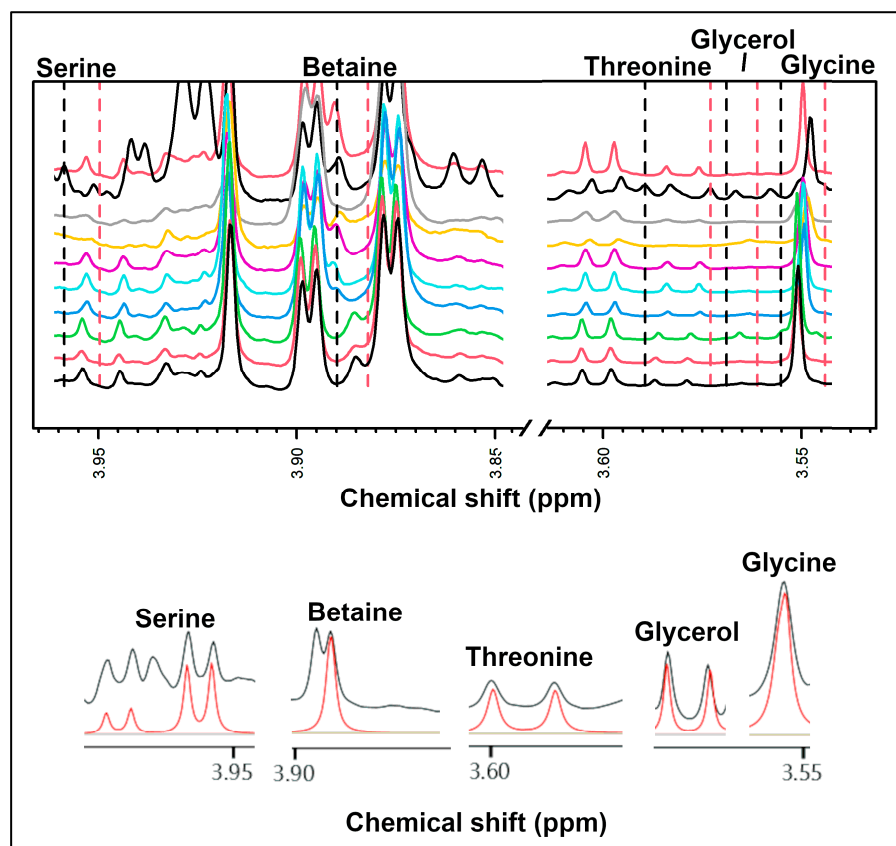



Figure S31

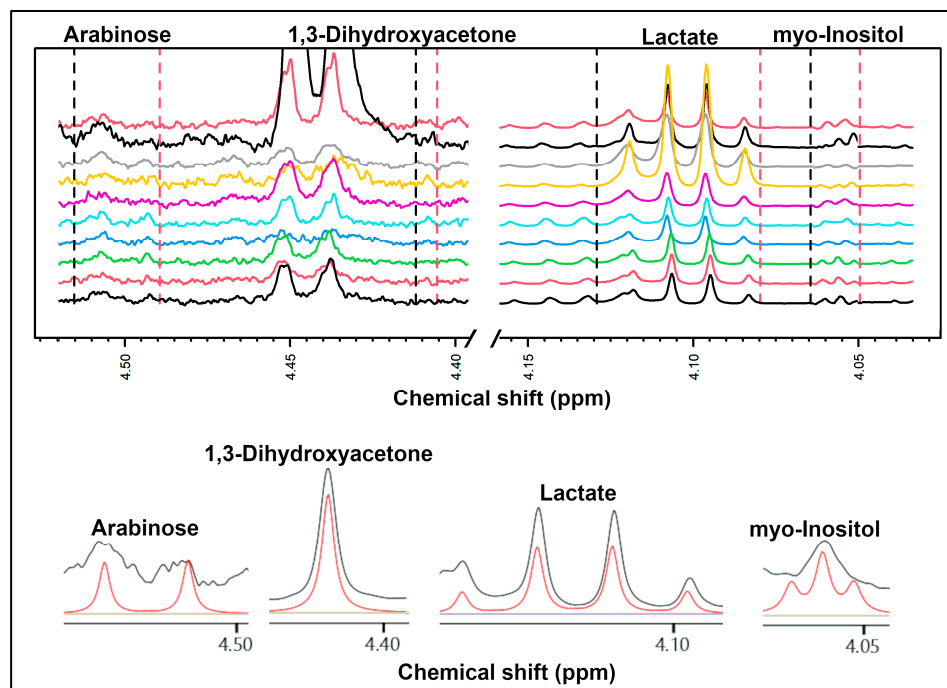

Figure S32

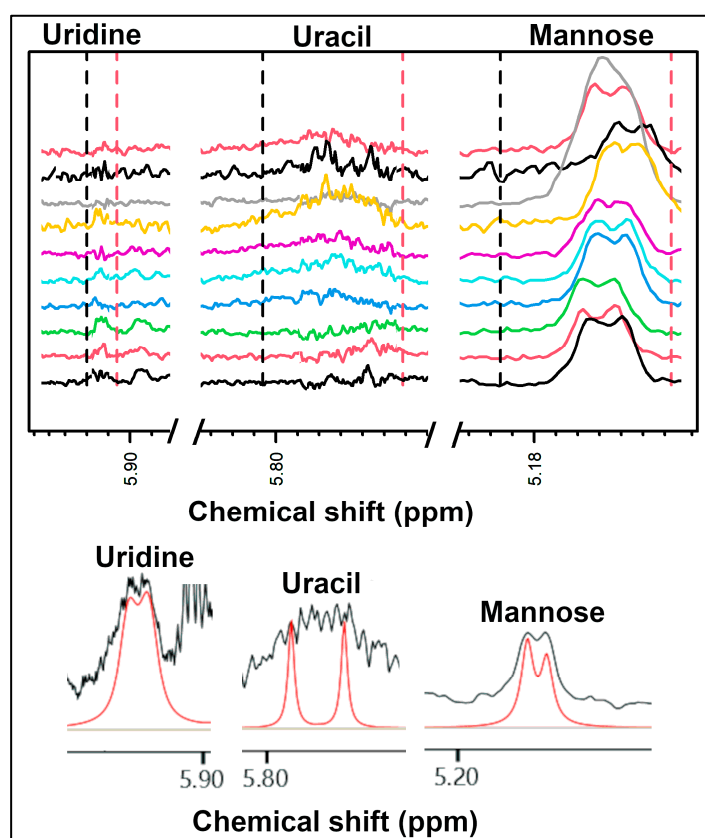

Figure S33

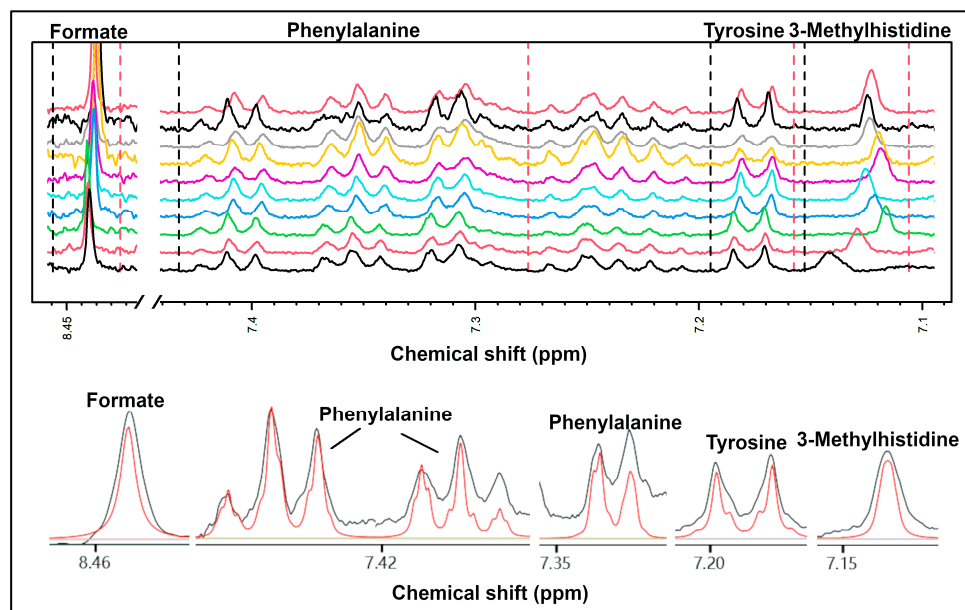

Supplement: s1 [file s1]
