# Supplementary material for: Metabolomic Analysis of Multiple Biological Specimens (Feces, Serum, and Urine) by 1H-NMR Spectroscopy from Dairy Cows with Clinical Mastitis
Source: Animals (Basel). 2023 Feb 19;13(4):741. doi: 10.3390/ani13040741 (PMC9952568; doi:10.3390/ani13040741)
Supplement: Supplementary file 1 [file animals-13-00741-s001.zip › supplementary tables.xlsx]

## Sheet: Table S1 Veen Diagram
Zone	Molecule	Source
Zone 1	2,3-Butanediol	Feces
	2-Oxoisocaproate	Feces
	3-Hydroxyphenylacetate	Feces
	Cadaverine	Feces
	Ethylene_glycol	Feces
	Hypoxanthine	Feces
	Isobutyrate	Feces
	Isovalerate	Feces
	N-Acetylglucosamine	Feces
	O-Acetylcholine	Feces
	O-Phosphocholine	Feces
	Phenylacetate	Feces
	Thymine	Feces
	Trimethylamine	Feces
Zone 2	1,3-Dihydroxyacetone	Feces, Serum
	Aspartate	Feces, Serum
	Choline	Feces, Serum
	Isoleucine	Feces, Serum
	Leucine	Feces, Serum
	Methionine	Feces, Serum
	Phenylalanine	Feces, Serum
	Pyruvate	Feces, Serum
	Sarcosine	Feces, Serum
	Serine	Feces, Serum
	Threonine	Feces, Serum
	Uridine	Feces, Serum
	Glycerol	Feces, Serum
	myo-Inositol	Feces, Serum
Zone 3	2-Aminobutyrate	Serum
	2-Hydroxybutyrate	Serum
	3-Hydroxyisobutyrate	Serum
	3-Methylhistidine	Serum
	Arabinose	Serum
	Arginine	Serum
	Asparagine	Serum
	Carnitine	Serum
	Dimethylglycine	Serum
	Fumarate	Serum
	Lysine	Serum
	Mannose	Serum
	Ornithine	Serum
	Proline	Serum
Zone 4	3-Methyl-2-oxovalerate	Feces, Urine
	3-Phenylpropionate	Feces, Urine
	4-Aminobutyrate	Feces, Urine
	4-Hydroxyphenylacetate	Feces, Urine
	Benzoate	Feces, Urine
	Butyrate	Feces, Urine
	Fucose	Feces, Urine
	Galactose	Feces, Urine
	Lactose	Feces, Urine
	Malonate	Feces, Urine
	Methylamine	Feces, Urine
	N,N-Dimethylglycine	Feces, Urine
	Propionate	Feces, Urine
	Sucrose	Feces, Urine
	Taurine	Feces, Urine
	Valerate	Feces, Urine
Zone 5	3-Hydroxybutyrate	Feces, Serum, Urine
	Acetate	Feces, Serum, Urine
	Acetoacetate	Feces, Serum, Urine
	Acetone	Feces, Serum, Urine
	Alanine	Feces, Serum, Urine
	Beta-Alanine	Feces, Serum, Urine
	Betaine	Feces, Serum, Urine
	Creatine	Feces, Serum, Urine
	Creatinine	Feces, Serum, Urine
	Dimethyl_sulfone	Feces, Serum, Urine
	Dimethylamine	Feces, Serum, Urine
	Ethanol	Feces, Serum, Urine
	Formate	Feces, Serum, Urine
	Glucose	Feces, Serum, Urine
	Glutamate	Feces, Serum, Urine
	Glutamine	Feces, Serum, Urine
	Glycine	Feces, Serum, Urine
	Lactate	Feces, Serum, Urine
	Methanol	Feces, Serum, Urine
	Succinate	Feces, Serum, Urine
	Tyrosine	Feces, Serum, Urine
	Uracil	Feces, Serum, Urine
	Valine	Feces, Serum, Urine
Zone 6	Citrate	Serum, Urine
	Methylsuccinate	Serum, Urine
	Propylene_glycol	Serum, Urine
Zone 7	2,6-Dihydroxybenzoate	Urine
	2-Hydroxy-3-methylvalerate	Urine
	2-Hydroxyisobutyrate	Urine
	2-Hydroxyisovalerate	Urine
	2-Oxobutyrate	Urine
	2-Oxoglutarate	Urine
	2-Oxovalerate	Urine
	2-Phenylpropionate	Urine
	3-Hydroxy-3-methylglutarate	Urine
	3-Hydroxyisovalerate	Urine
	3-Indoxylsulfate	Urine
	3-Methylglutarate	Urine
	4-Hydroxybenzoate	Urine
	Acetamide	Urine
	Acetoin	Urine
	Acetylsalicylate	Urine
	Allantoin	Urine
	Azelate	Urine
	cis-Aconitate	Urine
	Glutarate	Urine
	Hippurate	Urine
	Levulinate	Urine
	Malate	Urine
	N-Acetylaspartate	Urine
	N-Acetylglycine	Urine
	N-Methylhydantoin	Urine
	N-Phenylacetylglycine	Urine
	Pantothenate	Urine
	p-Cresol	Urine
	Pimelate	Urine
	Tiglylglycine	Urine
	Trehalose	Urine
	Trimethylamine_N-oxide	Urine
	Tyramine	Urine
	Xylose	Urine

## Sheet: Table S2 Feces
	Formate	Hypoxanthine	Benzoate	Phenylalanine	Phenylacetate	3-Hydroxyphenylacetate	Tyrosine	4-Hydroxyphenylacetate	Uridine	Uracil	Sucrose	N-Acetylglucosamine	Galactose	Lactose	1,3-Dihydroxyacetone	Lactate	Creatinine	Serine	Betaine	Ethylene_glycol	myo-Inositol	Threonine	Glycerol	Glycine	Methanol	Taurine	Glucose	O-Acetylcholine	O-Phosphocholine	Choline	Dimethyl_sulfone	Malonate	Cadaverine	Creatine	N,N-Dimethylglycine	Trimethylamine	Aspartate	Sarcosine	Dimethylamine	Methionine	Methylamine	Beta-Alanine	3-Phenylpropionate	Glutamine	Succinate	Isobutyrate	Pyruvate	Glutamate	4-Aminobutyrate
FH1	0.000157657	0.000204526	0.00140963	0.000153693	0.000347651	0.000174941	8.3738e-05	0.00021356	0.000101718	0.000282391	0.000107406	4.60173e-05	8.84251e-05	0.000202962	2.75953e-05	0.000200944	0.000183544	0.000146098	3.07096e-05	3.24781e-05	0.000105084	5.44059e-05	4.8223e-05	0.000373526	0.000111808	7.67322e-05	0.00035209	1.10486e-05	1.02833e-05	5.89785e-05	2.40565e-05	2.6405e-05	6.86899e-05	6.13719e-05	1.0269e-05	3.28073e-05	0.000231356	8.37396e-06	1.31329e-05	0.000108597	0.000179771	6.39331e-05	0.000357379	9.99181e-05	0.000102862	0.00133236	1.29052e-05	0.000290792	3.64429e-05
FH2	8.93129e-05	0.000204526	0.000242015	0.000169637	0.000109932	0.000376544	8.74065e-05	0.000302406	0.000100831	0.00029241	0.000152447	8.71954e-05	5.68053e-05	0.000256844	4.42453e-05	0.000245944	0.000119669	0.000123332	2.28e-05	3.31784e-05	0.000145172	7.44392e-05	0.000103959	0.000291433	0.000108003	7.00264e-05	0.000813971	1.31579e-05	1.38476e-05	9.39002e-05	2.08898e-05	4.28929e-05	8.73825e-05	3.60961e-05	4.68316e-06	3.47267e-05	0.00028045	1.34354e-05	1.78157e-05	0.000110343	0.000115073	5.54772e-05	0.000393145	0.000278243	0.000103077	0.00108988	8.32162e-06	0.000270284	2.74896e-05
FH3	0.00013781	0.000223479	0.000353104	0.000170721	0.000194285	0.000220139	0.000120926	9.76597e-05	9.32939e-05	0.000299912	0.000229425	7.33235e-05	0.000141265	0.000268688	6.48071e-05	0.000403386	0.000162065	0.000121887	2.43752e-05	4.61922e-05	0.000145315	7.6757e-05	0.000101087	0.000437582	0.000111266	0.000122104	0.000745228	1.07228e-05	9.81267e-06	0.000131418	4.34048e-05	3.13452e-05	7.26433e-05	4.06237e-05	3.83136e-06	1.62458e-05	0.000211747	1.00001e-05	1.75574e-05	9.20267e-05	0.00013834	0.00031178	0.000383003	0.000154447	8.72494e-05	0.00106895	6.85274e-06	0.000269247	2.91282e-05
FH4	0.000152035	0.000260945	0.000573127	0.000173692	0.000113302	0.000360643	9.01698e-05	0.00012523	9.28428e-05	0.000307107	0.00024492	8.20025e-05	0.000128197	0.000366127	5.23719e-05	0.000179323	0.000209526	0.00011509	1.63978e-05	4.54898e-05	0.000158933	9.88495e-05	0.000115967	0.000485596	0.000131434	7.76309e-05	0.000991453	7.73281e-06	8.97558e-06	8.15081e-05	2.04542e-05	4.50664e-05	6.53835e-05	5.02927e-05	3.24352e-06	2.68884e-05	0.000245598	1.79991e-05	1.26601e-05	0.000142291	0.0001226	0.000191548	0.000230854	0.000230716	8.5919e-05	0.000836271	7.7719e-06	0.000257457	8.30857e-06
FH5	9.85025e-05	0.000256345	0.000534683	0.000147752	0.000110628	0.000338184	9.63398e-05	0.000260821	7.43165e-05	0.000359396	0.000294033	0.000229559	0.000185582	0.000153061	4.80286e-05	0.000523479	0.000230204	0.000148045	1.67466e-05	5.41651e-05	0.000217869	0.000135653	0.000103801	0.000529728	0.000108498	5.84988e-05	0.00127137	9.24808e-06	7.94481e-06	8.71695e-05	1.9865e-05	5.08185e-05	7.44005e-05	5.28735e-05	4.52967e-06	4.12883e-05	0.000326384	1.3354e-05	1.30501e-05	9.64114e-05	9.00551e-05	0.000108753	0.000262638	0.000189182	7.44002e-05	0.000855357	7.76143e-06	0.000245348	1.46454e-05
FH6	0.000131698	0.000277822	0.000430739	0.000223643	9.68413e-05	0.000329174	0.000113968	0.000239573	0.000131403	0.000282391	0.000136898	7.09715e-05	0.000105333	0.000256651	5.52113e-05	0.000249685	0.000226955	9.81464e-05	2.43978e-05	5.90843e-05	0.0001234	7.70356e-05	0.000116114	0.000365263	0.000151389	0.000103309	0.000962266	9.32857e-06	8.20288e-06	7.35164e-05	3.76005e-05	2.88285e-05	6.58012e-05	3.97477e-05	3.97398e-06	2.20958e-05	0.000250644	9.33808e-06	1.79497e-05	0.00011099	0.000101392	5.65928e-05	0.000342322	0.000215134	6.65893e-05	0.00114747	5.50771e-06	0.000215902	1.90176e-05
FM1	0.000118132	0.000315565	9.70137e-05	0.000147753	7.21608e-05	0.000333522	9.79505e-05	0.000155597	0.00010027	0.000324517	0.000136227	5.47377e-05	7.85921e-05	0.000259902	7.80966e-05	0.000231451	0.000138964	0.000139181	2.15673e-05	5.19815e-05	0.000189512	8.29313e-05	0.000132103	0.000207922	0.000120116	6.59828e-05	0.000587491	5.58357e-06	5.36748e-06	0.000104961	2.68284e-05	5.4968e-05	7.63083e-05	1.1417e-05	9.57883e-06	5.90753e-05	0.000239447	1.08597e-05	1.96822e-05	0.000104873	9.63886e-05	6.22782e-05	0.000268939	0.000128626	6.67238e-05	0.00102278	1.00745e-05	0.00025708	3.05576e-05
FM2	0.000130416	0.000353225	8.26048e-05	0.000125152	0.000222769	0.00029132	6.52333e-05	0.000438527	0.000126443	0.000402261	0.000139183	9.03912e-05	0.000121973	0.000259596	8.19782e-05	0.000268606	0.000236874	9.55835e-05	1.43873e-05	6.74532e-05	0.000171531	8.1486e-05	0.000141044	0.000171397	0.000555489	3.80711e-05	0.00108724	6.32437e-06	6.42768e-06	0.000155533	2.40565e-05	8.26149e-05	9.52534e-05	0.000200248	3.62696e-06	1.55589e-05	0.000319236	8.37213e-06	1.23458e-05	7.38548e-05	2.41924e-05	7.62919e-05	0.000182787	0.000159943	7.56486e-05	0.00111357	1.05186e-05	0.000214699	1.21386e-05
FM3	0.000107825	0.000294793	0.000594923	0.000193524	0.000119529	0.000200037	8.3738e-05	0.000134327	0.00014565	0.000324727	0.000443125	0.000109648	0.000109282	0.000414632	7.17603e-05	0.000135197	0.000189058	0.000102322	1.79674e-05	4.35355e-05	0.000201152	0.000152088	0.000149239	0.000168532	0.000158097	8.28289e-05	0.00208223	4.50611e-06	6.32727e-06	9.33841e-05	3.56658e-05	2.79383e-05	6.06852e-05	2.56659e-05	7.42739e-06	2.0651e-05	0.000236607	1.07201e-05	6.64109e-06	0.000106045	4.58878e-05	7.02669e-05	0.000361022	0.000115131	6.35464e-05	0.000829953	9.24856e-06	0.000190802	1.56278e-05
FM4	9.48668e-05	0.000232602	0.000135944	0.000153693	4.18899e-05	0.00041216	6.85305e-05	0.000122825	8.77226e-05	0.00035447	0.000204592	5.03512e-05	0.000132309	0.000487942	6.26426e-05	0.000551582	0.000109616	0.000124803	8.05893e-06	4.78591e-05	0.000125256	7.59188e-05	0.000127811	0.000120979	0.00015515	8.75222e-05	0.00090098	7.80202e-06	5.84238e-06	5.00188e-05	1.68851e-05	4.33136e-05	5.04469e-05	8.89708e-06	1.99756e-06	4.11201e-05	0.000259827	1.01891e-05	1.40826e-05	8.4307e-05	0.000109735	7.24823e-05	0.000264955	0.000118494	5.0905e-05	0.000944122	1.24596e-05	0.00016164	1.65369e-05
FM5	9.64818e-05	0.000287383	0.000115757	0.000131739	5.84369e-05	0.000480432	0.00010392	0.000163416	0.000112323	0.00030931	8.16862e-05	0.000104077	6.81333e-05	0.000287036	6.61253e-05	0.000377997	6.56443e-05	0.000127076	2.04096e-05	4.38084e-05	0.000105084	3.4352e-05	0.000147172	0.000172505	0.000130167	0.000101043	0.000505166	5.44697e-06	6.87711e-06	5.87711e-05	3.9893e-05	5.23518e-05	7.02681e-05	1.67818e-05	4.53343e-06	4.57777e-05	0.000281131	7.97943e-06	1.13978e-05	0.000113756	9.37563e-05	5.70265e-05	0.000269206	0.000166373	6.34991e-05	0.000914855	1.82408e-05	0.000233262	1.05992e-05
FM6	0.000151761	0.00018643	0.00010451	0.000206611	0.000603919	0.000233663	7.33707e-05	7.76477e-05	7.28545e-05	0.000286876	0.000118247	0.000136083	0.000150286	0.00022897	3.66791e-05	0.000277887	0.000105098	0.000137877	2.19142e-05	3.54967e-05	8.54798e-05	5.49254e-05	6.71973e-05	0.00015794	0.000239519	6.19822e-05	0.00048949	1.10486e-05	1.21185e-05	9.40691e-05	1.16538e-05	2.57366e-05	5.77008e-05	1.36573e-05	2.11357e-06	2.7644e-05	0.000252328	1.66237e-05	4.64555e-06	9.90796e-05	3.67336e-05	8.13966e-05	0.000601026	9.51103e-05	0.000107316	0.00268469	1.2915e-05	0.000242234	1.60395e-05
FM7	9.54654e-05	0.000345116	0.000383433	0.000162717	0.000171235	0.000161862	6.34148e-05	0.000171987	0.000128778	0.000419194	9.26207e-05	9.2345e-05	9.24021e-05	0.000173532	6.67248e-05	0.000194727	0.000152367	0.000146098	2.32936e-05	5.97676e-05	0.000163221	9.58694e-05	0.000118536	0.000188692	0.000116068	7.86535e-05	0.000731012	4.45232e-06	4.31877e-06	0.000106974	2.50384e-05	3.48701e-05	7.67929e-05	1.70896e-05	5.79449e-06	7.56227e-05	0.000268353	7.70931e-06	1.11864e-05	7.62235e-05	0.000160553	5.54183e-05	0.000244718	0.00011217	4.13353e-05	0.000921524	1.49818e-05	0.000273943	8.32175e-06
Mean
FH	0.000127836	0.000237941	0.000590549	0.00017319	0.000162107	0.000299937	9.8758e-05	0.000206542	9.90674e-05	0.000303934	0.000194188	9.81782e-05	0.000117601	0.000250722	4.87099e-05	0.00030046	0.000188661	0.000125433	2.25712e-05	4.5098e-05	0.000149295	8.619e-05	9.81918e-05	0.000413855	0.0001204	8.47169e-05	0.000856064	1.02065e-05	9.84447e-06	8.77485e-05	2.77118e-05	3.75594e-05	7.23835e-05	4.68343e-05	5.08844e-06	2.90087e-05	0.000257697	1.20834e-05	1.5361e-05	0.00011011	0.000124538	0.000131347	0.000328223	0.000194607	8.66828e-05	0.00105505	8.18676e-06	0.000258172	2.25054e-05
FM	0.000113564	0.000287873	0.000216312	0.00016017	0.000184277	0.000301856	7.94511e-05	0.000180618	0.000110577	0.000345908	0.000173669	9.10906e-05	0.000107568	0.000301659	6.62867e-05	0.000291064	0.000142517	0.000124706	1.82284e-05	4.9986e-05	0.000148748	8.251e-05	0.000126158	0.00016971	0.000210658	7.37263e-05	0.000911945	6.452e-06	6.75417e-06	9.48158e-05	2.57173e-05	4.59705e-05	6.96365e-05	4.19652e-05	5.01032e-06	4.07785e-05	0.000265275	1.03505e-05	1.14259e-05	9.40198e-05	8.10354e-05	6.78801e-05	0.000313236	0.000127978	6.69962e-05	0.0012045	1.26341e-05	0.000224809	1.56888e-05
SD
FH	2.80491e-05	3.13071e-05	0.000418977	2.68019e-05	9.74429e-05	8.22961e-05	1.52106e-05	7.96787e-05	1.86569e-05	2.88561e-05	7.25808e-05	6.59119e-05	4.47024e-05	7.14597e-05	1.24982e-05	0.000134506	4.27107e-05	1.90099e-05	5.38358e-06	1.07751e-05	3.86091e-05	2.80282e-05	2.53265e-05	8.73054e-05	1.75196e-05	2.34973e-05	0.000306639	1.87056e-06	2.15766e-06	2.45537e-05	1.01804e-05	9.9987e-06	8.18628e-06	9.63197e-06	2.58999e-06	9.08944e-06	4.05883e-05	3.57979e-06	2.65145e-06	1.76263e-05	3.181e-05	0.000102547	6.64028e-05	6.21747e-05	1.4738e-05	0.000186863	2.51363e-06	2.56324e-05	1.03774e-05
FM	2.14699e-05	6.01502e-05	0.000196831	3.02944e-05	0.000196054	0.000115315	1.62013e-05	0.000118039	2.53894e-05	4.8905e-05	0.000125336	3.03333e-05	2.96427e-05	0.000110221	1.47522e-05	0.000137377	5.71125e-05	1.91285e-05	5.37569e-06	1.07935e-05	4.39653e-05	3.68427e-05	2.81912e-05	2.69129e-05	0.000157696	2.04649e-05	0.000560114	2.32798e-06	2.50883e-06	3.47512e-05	9.83333e-06	1.97034e-05	1.4962e-05	7.00002e-05	2.79694e-06	2.15548e-05	2.84573e-05	3.06287e-06	4.91591e-06	1.5786e-05	4.82588e-05	9.8726e-06	0.000137265	2.60817e-05	2.09846e-05	0.000658825	3.15025e-06	3.89009e-05	7.24235e-06
p value	0.334867	0.0868429	0.0109998	0.428534	0.600433	0.972824	0.0491508	0.477049	0.368034	0.0688245	0.346044	0.907851	0.651236	0.339426	0.0401809	0.796332	0.124935	0.946606	0.175498	0.432977	0.981355	0.841985	0.0864149	2.68238e-05	0.0279973	0.393267	0.870558	0.00814703	0.036013	0.677344	0.727591	0.503112	0.685082	0.0310113	0.959274	0.223688	0.710349	0.313714	0.0988983	0.115293	0.0795398	0.418869	0.516626	0.0469263	0.0744225	0.9381	0.0164389	0.0930669	0.210373
[truncated: 18 more columns]

## Sheet: Table S3 Serum
	Formate	Phenylalanine	Tyrosine	3-Methylhistidine	Fumarate	Uridine	Uracil	Mannose	Arabinose	1,3-Dihydroxyacetone	Lactate	myo-Inositol	Serine	Betaine	Threonine	Glycerol	Glycine	Methanol	Glucose	Carnitine	Choline	Dimethyl_sulfone	Ornithine	Creatinine	Creatine	Lysine	Asparagine	Dimethylglycine	Aspartate	Sarcosine	Dimethylamine	Methionine	Beta-Alanine	Citrate	Glutamine	Succinate	Pyruvate	Acetoacetate	Acetone	Glutamate	Proline	Arginine	Acetate	Alanine	3-Hydroxybutyrate	Ethanol	Propylene_glycol	Methylsuccinate	3-Hydroxyisobutyrate
SH1	0.0857449	0.58564	0.138082	0.276764	0.0105272	0.0638447	0.0623549	0.121845	0.119565	0.00106818	4.98892	0.119175	0.420828	0.181008	0.26803	0.2079	1.5405	0.107431	10.5193	0.795587	0.0148546	0.103877	0.037251	0.135315	0.722545	0.137217	0.164053	0.0142648	0.00237514	0.00873355	0.02292	0.0950045	0.0308355	0.585006	0.704656	0.0403207	0.0745054	0.155506	0.0915704	1.00934	0.1692	0.63208	4.26288	0.562187	1.63859	0.0395285	0.112893	0.011091	0.0721393
SH2	0.0920978	0.581368	0.145459	0.316499	0.010238	0.0643103	0.101694	0.110115	0.118209	0.00145343	5.79062	0.137099	0.373352	0.158657	0.324167	0.188018	1.19337	0.0605814	18.4096	1.5167	0.0235751	0.0488243	0.0346197	0.110609	0.807017	0.141135	0.138929	0.0169706	0.00310172	0.0120829	0.00437843	0.126912	0.0423645	0.566485	0.623132	0.0375587	0.0780851	0.137146	0.0685585	0.958483	0.605224	0.654504	3.83513	0.725009	1.23924	0.0278011	0.153841	0.0100286	0.0666449
SH3	0.0985658	0.512215	0.164189	0.239499	0.00664147	0.0649986	0.0644451	0.104795	0.10696	0.00141537	4.88307	0.114813	0.395419	0.184092	0.279499	0.380553	1.75539	0.044757	11.3194	0.988977	0.0171672	0.0440549	0.0187301	0.127737	0.85079	0.143102	0.174181	0.0176271	0.00570584	0.014852	0.0036353	0.115551	0.0234159	0.459821	0.561888	0.0240415	0.0677598	0.12952	0.0920269	0.824796	0.318607	0.628929	2.74092	0.647201	1.15032	0.00907118	0.150202	0.00544525	0.0484728
SH4	0.156829	0.783427	0.188515	0.310233	0.0137306	0.0461783	0.123535	0.183711	0.12454	0.00175646	6.72214	0.119951	0.430818	0.264707	0.245892	0.196854	1.47605	0.0528614	15.4699	0.828293	0.0323607	0.0523239	0.0186218	0.0574716	0.928449	0.150973	0.153728	0.00991197	0.0181627	0.0239307	0.00433642	0.101263	0.0214928	0.487779	0.700072	0.0199846	0.0858902	0.134776	0.082528	1.46711	0.1331	0.383487	3.68178	0.541925	1.46829	0.016571	0.0850644	0.00690835	0.0500634
SH5	0.0961627	0.583627	0.165042	0.259665	0.00946723	0.055168	0.128942	0.1086	0.110973	0.00267932	4.15922	0.13896	0.374565	0.11189	0.361056	0.0771171	1.20107	0.0666314	13.9332	0.798321	0.0647202	0.0544301	0.0320331	0.0934127	0.832775	0.179072	0.191054	0.0105879	0.00569527	0.0148132	0.00961395	0.116001	0.0138489	0.546721	0.394968	0.0181716	0.056186	0.157266	0.115831	0.814567	0.177706	0.711746	5.86671	0.579892	2.07079	0.00987043	0.101771	0.00900855	0.0757116
SM1	0.131603	0.644066	0.176856	0.350853	0.0111214	0.0326847	0.120517	0.105551	0.130603	0.00129694	6.29637	0.147403	0.419788	0.224941	0.335364	0.130964	1.34095	0.0503962	11.9076	0.720973	0.0503658	0.0572019	0.00270734	0.0408037	0.764215	0.105401	0.154127	0.0117265	0.00511656	0.0181799	0.00365735	0.105286	0.0342667	0.390366	0.538784	0.0221705	0.106038	0.109062	0.0628982	1.18714	0.13608	0.633643	2.16019	0.534276	1.08772	0.00776488	0.0966849	0.00784956	0.0580646
SM2	0.212626	1.19172	0.137998	0.35268	0.0139997	0.0984453	0.249814	0.219399	0.177442	0.00354411	23.0938	0.072822	0.514629	0.337389	0.0599306	0.619616	1.05096	0.0605931	6.95894	0.83595	0.126054	0.0255401	0.00493597	0.0908565	0.872261	0.153277	0.120109	0.0222114	0.00293817	0.0293486	0.0033258	0.127681	0.0192188	0.0757934	0.502051	0.0117507	0.372655	0.0949528	0.0374653	2.83054	0.0896376	0.629817	0.826994	0.595923	0.790564	0.140875	0.112962	0.00395232	0.0772184
SM3	0.116745	1.00604	0.135709	0.377217	0.0123313	0.0308927	0.099728	0.392922	0.172566	0.00240356	15.6251	0.0769246	0.434768	0.246933	0.238942	0.12169	0.968027	0.0808101	15.3543	0.631594	0.00864742	0.0490509	0.00944796	0.0509495	0.463076	0.158436	0.122018	0.0079662	0.00238494	0.0215493	0.0154606	0.11593	0.036178	0.295593	0.487611	0.0224331	0.160237	0.148037	0.0980563	2.23006	0.130429	0.985279	3.83156	0.689904	1.63183	0.0112216	0.0759251	0.0097814	0.130759
SM4	0.196578	0.84239	0.206752	0.288442	0.0104302	0.0639688	0.138357	0.127107	0.223984	0.00489819	9.18793	0.197632	0.700558	0.191658	1.09243	0.436809	1.38551	0.104333	5.40749	0.338771	0.117968	0.0762849	0.0508629	0.0848849	0.72114	0.27356	0.132567	0.0131933	0.0217116	0.0186441	0.0123217	0.127603	0.0679002	0.406941	0.47525	0.0323124	0.106852	0.110884	0.0583319	0.88719	0.0977682	0.383828	2.96891	0.488595	1.0674	0.0312121	0.0708527	0.00830865	0.0804275
SM5	0.11366	0.666161	0.163589	0.374708	0.00947496	0.0495978	0.12107	0.132341	0.102066	0.00333944	6.20547	0.149552	0.413454	0.269754	0.354995	0.161195	1.05685	0.0954725	11.6675	0.725636	0.0538425	0.078359	0.050252	0.0634009	0.788133	0.268096	0.146056	0.0109612	0.0036041	0.0207581	0.0165154	0.121897	0.0166457	0.231627	0.52687	0.0169864	0.0526476	0.141315	0.0706468	1.70761	0.190045	0.764515	3.32766	0.46272	1.29964	0.00738306	0.0818209	0.0103528	0.0734034
Mean
SH	0.10588	0.609256	0.160257	0.280532	0.0101209	0.0589	0.0961942	0.125813	0.11605	0.00167455	5.30879	0.126	0.398996	0.180071	0.295729	0.210088	1.43328	0.0664524	13.9303	0.985576	0.0305356	0.0607021	0.0282511	0.104909	0.828315	0.1503	0.164389	0.0138725	0.00700813	0.0148825	0.00897682	0.110947	0.0263915	0.529163	0.596943	0.0280154	0.0724853	0.142843	0.090103	1.01486	0.280767	0.602149	4.07748	0.611243	1.51345	0.0205684	0.120754	0.00849634	0.0626064
SM	0.154242	0.870075	0.164181	0.34878	0.0114715	0.0551179	0.145897	0.195464	0.161332	0.00309645	12.0817	0.128867	0.496639	0.254135	0.416333	0.294055	1.16046	0.078321	10.2592	0.650585	0.0713756	0.0572874	0.0236412	0.0661791	0.721765	0.191754	0.134975	0.0132117	0.00715107	0.021696	0.0102562	0.119679	0.0348419	0.280064	0.506113	0.0211306	0.159686	0.12085	0.0654797	1.76851	0.128792	0.679417	2.62306	0.554284	1.17543	0.0396914	0.0876491	0.00804894	0.0839745
SD
SH	0.0288923	0.102158	0.0196696	0.0328219	0.00253685	0.00816523	0.0316358	0.0329865	0.00702668	0.000612377	0.979127	0.0111746	0.0262516	0.0554245	0.0463431	0.108865	0.239038	0.0243369	3.19711	0.307411	0.0202791	0.0244533	0.00893356	0.0310669	0.0744862	0.0168466	0.0198045	0.00354696	0.00641421	0.00564633	0.00815519	0.0127434	0.0107826	0.053246	0.127423	0.0102431	0.0112153	0.0126828	0.0172434	0.266451	0.194666	0.126668	1.14427	0.0748834	0.365849	0.0129847	0.03024	0.00230071	0.0126097
SM	0.0468148	0.23204	0.029451	0.0358505	0.00175531	0.0277317	0.0596821	0.118642	0.0468181	0.00134388	7.24906	0.0532428	0.120996	0.0547328	0.395575	0.22379	0.189064	0.0227546	4.03397	0.18877	0.049609	0.0216833	0.0246917	0.0214619	0.154739	0.0751129	0.0148683	0.00538007	0.00820355	0.0045039	0.00636603	0.00939374	0.0204337	0.134702	0.0265028	0.00763162	0.124983	0.0227318	0.0219687	0.784118	0.0396967	0.2195	1.17438	0.0911398	0.312736	0.0574102	0.0171458	0.00250991	0.027523
p value	0.0480937	0.0353146	0.836267	0.0139469	0.359689	0.445919	0.0991361	0.22931	0.205038	0.0736943	0.0289876	0.64477	0.0451956	0.0661979	0.976732	0.500343	0.0781378	0.363173	0.16329	0.0796176	0.305212	0.693215	0.369018	0.0647055	0.216633	0.576356	0.0362893	0.622681	0.911593	0.0696325	0.934846	0.255375	0.457468	0.0111034	0.451085	0.243878	0.305004	0.105672	0.0861814	0.0624245	0.054904	0.72676	0.119903	0.235581	0.151391	0.805286	0.0604218	0.776431	0.116425
[truncated: 5 more columns]

## Sheet: Table S4 Urine
	Formate	4-Hydroxybenzoate	3-Indoxylsulfate	Benzoate	Tyramine	Tyrosine	4-Hydroxyphenylacetate	Tiglylglycine	2,6-Dihydroxybenzoate	Uracil	Allantoin	Galactose	Trehalose	Glucose	Xylose	Sucrose	Creatinine	Hippurate	Creatine	N-Phenylacetylglycine	Glycine	Taurine	Methanol	Lactose	Trimethylamine_N-oxide	Betaine	Beta-Alanine	Dimethyl_sulfone	Malonate	cis-Aconitate	4-Aminobutyrate	N-Methylhydantoin	N,N-Dimethylglycine	Dimethylamine	Methylamine	Citrate	3-Phenylpropionate	Glutamine	2-Oxoglutarate	3-Hydroxy-3-methylglutarate	Succinate	Malate	Acetylsalicylate	Acetoacetate	p-Cresol	Acetone	Levulinate	Pimelate	Azelate
UH1	0.000687076	0.12318	0.000118992	0.00373625	0.000685918	0.000542328	0.00060701	0.000183274	0.000197737	0.00032396	0.0297412	0.000226846	3.92553e-05	0.00125727	0.000154247	0.000275723	0.00604394	0.121028	0.0134911	0.0157608	0.000892414	0.000497693	0.000107186	0.00301089	0.00259956	0.000183258	0.000250138	0.000571313	0.000393974	0.000363851	0.000581637	3.78421e-05	3.46459e-05	0.000471336	7.90288e-05	0.00121013	4.87198e-05	0.000526902	8.42645e-05	0.00010852	0.000173458	0.00192713	0.00489536	0.000287719	0.000111272	0.000101917	1.12282e-05	0.000302961	0.00145711
UH2	0.000683895	0.123577	6.91845e-05	0.00388465	0.000679904	0.000568618	0.000626996	0.00015172	0.000217359	0.000284044	0.029523	0.000201107	3.92564e-05	0.0012625	0.000129387	0.000308646	0.00593338	0.120763	0.0133176	0.0156732	0.000938487	0.000562647	0.000104285	0.00288895	0.00260959	0.000154087	0.000253297	0.0005679	0.00038219	0.000395039	0.000545882	3.79283e-05	3.38092e-05	0.00046696	6.48653e-05	0.00118865	6.62031e-05	0.000487371	0.000112965	0.000116711	0.000178521	0.00185499	0.00488767	0.000286971	0.000115185	0.000104792	1.2108e-05	0.000305862	0.00144741
UH3	0.000677723	0.123321	0.000137778	0.00384808	0.000695704	0.000574479	0.000639932	0.000179847	0.00020825	0.000316696	0.0295499	0.000232397	5.7898e-05	0.00128307	0.000159149	0.000270612	0.00586072	0.121249	0.0134836	0.0156414	0.000921471	0.000539522	0.00010718	0.00307572	0.00259562	0.000171322	0.00025549	0.000570203	0.000386569	0.000364435	0.000540137	3.78944e-05	3.4668e-05	0.000467743	7.11084e-05	0.00120826	5.79191e-05	0.000523827	0.000101006	0.000108525	0.000175402	0.00190729	0.0048839	0.000287037	0.000112975	0.0001024	9.37012e-06	0.000297254	0.00143574
UH4	0.000571365	0.139054	0.000468075	0.00722813	0.000329633	0.000537842	0.000688658	0.000198954	0.000167407	0.00022958	0.0294499	0.00018827	3.46314e-05	0.00107771	0.000145862	0.000128866	0.00800562	0.137267	0.00854882	0.0150303	0.00109037	0.000723321	6.56513e-05	0.00239018	0.00308566	0.000209121	0.000257551	0.000576038	0.000449931	0.000395301	0.000380709	1.17751e-05	3.34577e-05	0.000511004	0.000147836	0.000980488	0.000240533	0.00107454	0.000237121	4.83912e-05	0.00020157	0.000607746	0.00440546	0.00022017	0.000147981	6.94073e-05	6.86281e-06	0.000413707	0.00117221
UH5	0.000606038	0.140582	0.0004072	0.00744403	0.000335972	0.000552323	0.000695169	0.000197842	0.000182611	0.000238883	0.0293782	0.000223985	4.2234e-05	0.00106083	0.000148406	0.000126384	0.00793077	0.138224	0.00851274	0.0150346	0.00103938	0.000719257	6.37803e-05	0.00214954	0.00308035	0.000222944	0.000229059	0.000583339	0.000474246	0.000412636	0.000377619	1.26982e-05	3.37235e-05	0.000513803	0.000135196	0.000977321	0.00022185	0.00113258	0.000227611	3.38035e-05	0.000199644	0.000599407	0.00442937	0.000222438	0.000147475	6.87754e-05	5.35113e-06	0.000402313	0.00113464
UM1	0.000337372	0.189507	0.000490509	0.0054296	0.000364796	0.000460568	0.00105887	0.000182414	0.000204454	0.000252298	0.036326	9.2123e-05	3.00228e-05	0.00126316	0.000187246	0.000175124	0.00734018	0.185449	0.00832804	0.0181749	0.00032916	0.00239883	3.24034e-05	0.0106945	0.00188672	0.000321124	0.000457422	0.000382177	0.000589385	0.000218826	0.00107182	1.32922e-05	2.64686e-06	0.000451764	0.000247939	0.000524396	3.72861e-05	0.000879551	0.000215548	5.94945e-05	5.32963e-05	0.000960141	0.00502925	0.000309847	0.000109046	8.14826e-05	7.9614e-06	0.000538841	0.00167921
UM2	0.000337074	0.193234	0.000471437	0.0055498	0.00034064	0.000437369	0.00105004	0.000167893	0.000206216	0.00026271	0.0372987	9.85418e-05	3.64482e-05	0.00128224	0.000185353	0.000173839	0.00748046	0.188695	0.00842868	0.018483	0.000329008	0.0024402	3.24953e-05	0.0105714	0.00191535	0.000320598	0.000461718	0.000386779	0.00059672	0.000202569	0.00107351	1.21575e-05	2.49821e-06	0.000457979	0.000251296	0.000549337	3.54827e-05	0.00089389	0.000212666	6.11773e-05	5.21054e-05	0.000944609	0.00511762	0.000316558	0.000109061	8.23931e-05	9.59435e-06	0.000540497	0.0017116
UM3	0.00032895	0.186558	0.000447849	0.00556283	0.000345023	0.000450928	0.00104463	0.000163481	0.000210193	0.000256798	0.0358651	8.69995e-05	3.31957e-05	0.00124094	0.000180138	0.000192315	0.00718408	0.183723	0.00820099	0.017985	0.000313143	0.00231693	3.26229e-05	0.010231	0.00185275	0.000293386	0.000429687	0.000371253	0.000553939	0.000150796	0.00103762	1.24094e-05	2.30963e-06	0.000444071	0.000235193	0.000507853	5.16955e-05	0.000886988	0.000180811	6.3586e-05	5.01275e-05	0.000875546	0.00495892	0.000307239	0.000102418	7.91628e-05	1.10509e-05	0.000526559	0.00169318
UM4	0.000348564	0.197907	0.00046917	0.00585997	0.00036181	0.000444683	0.00107134	0.000165701	0.000222829	0.00027279	0.0380821	9.73344e-05	3.0877e-05	0.00126733	0.000191999	0.000203465	0.00757927	0.19427	0.00865656	0.019001	0.000337706	0.00245714	3.25302e-05	0.0108026	0.00195776	0.000319295	0.000462907	0.000394876	0.000605475	0.000193781	0.00110066	1.50383e-05	3.75276e-06	0.000467562	0.000255797	0.000537395	4.27335e-05	0.000950315	0.000217838	5.79888e-05	5.22225e-05	0.000933456	0.00524902	0.000321908	0.000109959	8.29557e-05	8.97116e-06	0.000552935	0.00174925
Mean
UH	0.000645219	0.129943	0.000240246	0.00522823	0.000545426	0.000555118	0.000651553	0.000182327	0.000194673	0.000278633	0.0295284	0.000214521	4.2655e-05	0.00118827	0.00014741	0.000222046	0.00675489	0.127706	0.0114708	0.0154281	0.000976424	0.000608488	8.96165e-05	0.00270305	0.00279415	0.000188146	0.000249107	0.000573759	0.000417382	0.000386253	0.000485197	2.76276e-05	3.40608e-05	0.000486169	9.96071e-05	0.00111297	0.000127045	0.000749044	0.000152594	8.31902e-05	0.000185719	0.00137931	0.00470035	0.000260867	0.000126978	8.94581e-05	8.98405e-06	0.000344419	0.00132942
UM	0.00033799	0.191801	0.000469741	0.00560055	0.000353067	0.000448387	0.00105622	0.000169872	0.000210923	0.000261149	0.036893	9.37497e-05	3.26359e-05	0.00126342	0.000186184	0.000186186	0.007396	0.188034	0.00840357	0.018411	0.000327254	0.00240327	3.2513e-05	0.0105748	0.00190315	0.000313601	0.000452934	0.000383771	0.00058638	0.000191493	0.0010709	1.32244e-05	2.80186e-06	0.000455344	0.000247556	0.000529745	4.17995e-05	0.000902686	0.000206716	6.05616e-05	5.19379e-05	0.000928438	0.0050887	0.000313888	0.000107621	8.14986e-05	9.39445e-06	0.000539708	0.00170831
SD
UH	5.31365e-05	0.00903217	0.000183197	0.00192649	0.000194193	1.6023e-05	3.8734e-05	1.91116e-05	1.99832e-05	4.33557e-05	0.000136463	1.89081e-05	8.94447e-06	0.000109231	1.13223e-05	8.74256e-05	0.00110983	0.00917222	0.00268477	0.000363749	8.43552e-05	0.000105581	2.27715e-05	0.000410021	0.000263736	2.79186e-05	1.15389e-05	6.12215e-06	4.1919e-05	2.14069e-05	9.80976e-05	1.40538e-05	5.59424e-07	2.40257e-05	3.88436e-05	0.000122677	9.5502e-05	0.000324649	7.3609e-05	3.89138e-05	1.37272e-05	0.000708644	0.000258454	3.61259e-05	1.89941e-05	1.86254e-05	2.85667e-06	5.82719e-05	0.000161389
UM	8.05707e-06	0.00490229	1.74526e-05	0.000183051	1.2016e-05	9.83087e-06	1.16631e-05	8.55319e-06	8.29216e-06	8.8546e-06	0.000992759	5.29229e-06	2.87337e-06	1.70774e-05	4.90534e-06	1.42707e-05	0.000171999	0.00464016	0.000192683	0.000443655	1.02483e-05	6.25587e-05	9.07394e-08	0.000247944	4.45001e-05	1.34986e-05	1.56757e-05	9.85947e-06	2.26051e-05	2.90473e-05	2.58265e-05	1.30352e-06	6.48778e-07	9.93514e-06	8.84834e-06	1.77977e-05	7.28181e-06	3.22879e-05	1.7399e-05	2.40031e-06	1.32062e-06	3.69203e-05	0.000125055	6.6326e-06	3.4948e-06	1.67127e-06	1.29314e-06	1.07891e-05	3.03447e-05
p value	4.13672e-06	7.93662e-06	0.0483102	0.283078	0.297086	7.88472e-06	4.43019e-06	0.242072	0.154009	0.424636	5.42363e-07	3.08907e-06	0.0227357	0.200256	0.000582029	0.414955	0.268444	1.18231e-05	0.0278036	4.40599e-05	3.04332e-07	1.88738e-08	6.45858e-11	7.88412e-09	7.18744e-05	0.0001169	1.82013e-06	6.98211e-07	0.000191516	6.04562e-05	8.07496e-05	0.124521	3.11391e-10	0.0290262	0.000689824	1.47822e-05	0.0162679	0.350925	0.178544	0.263713	7.43752e-09	0.717271	0.0254472	0.0289325	0.0330841	0.394555	0.784356	0.00132937	0.00541013
[truncated: 28 more columns]
